# Supplementary material for: NET1 promotes HCC growth and metastasis in vitro and in vivo via activating the Akt signaling pathway
Source: publisher site journal article supplement (doi:10.18632/aging.202845), 2021-04-11
Supplement: Supplementary file [file aging-v13i7-202845-supplementary-material-SD1.pdf]

## SUPPLEMENTARY TABLES

**Supplementary Table 1. Primer sequence.**

| Gene      | Forward                                                        | Reverse                                                        |
|-----------|----------------------------------------------------------------|----------------------------------------------------------------|
| NET1      | TGCTCTAGAATGGAGCCCGAGCTGGCGGCTC<br>AGA                         | CCATCGATCCACCAAAGTCTCTTTCCGTTTGC<br>CA                         |
| NET1-Sh1  | CCGGCCCGAGGTGAACAGGATTTAACTCGAG<br>TTAAATCCTGTTCACCTCGGGTTTTTG | AATTCAAAAACCCGAGGTGAACAGGATTTAA<br>CTCGAGTTAAATCCTGTTCACCTCGGG |
| NET1-Sh2  | CCGGCGCCTAGTCAAATACCCTTTACTCGAG<br>TAAAGGGTATTTGACTAGGCGTTTTTG | AATTCAAAAACGCCTAGTCAAATACCCTTTA<br>CTCGAGTAAAGGGTATTTGACTAGGCG |
| MMP2      | CCCACTGCGGTTTTCTCGAAT                                          | CAAAGGGGTATCCATCGCCAT                                          |
| Cyclin D1 | GCTGCGAAGTGGAACCATC                                            | CCTCCTTCTGCACACATTTGAA                                         |
| Vimentin  | GACGCCATCAACACCGAGTT                                           | CTTTGTCGTTGGTTAGCTGGT                                          |

**Supplementary Table 2. Correlation between NET1 expression and clinicopathological characteristics.**

| Variables               | Number | NET1, <i>n</i> (%) |                 | <i>P</i> -value |
|-------------------------|--------|--------------------|-----------------|-----------------|
|                         |        | Low expression     | High expression |                 |
| Age, years              |        |                    |                 | 0.890           |
| <50                     | 107    | 53 (50.5%)         | 54 (51.4%)      |                 |
| ≥50                     | 103    | 52 (49.5%)         | 51 (48.6%)      |                 |
| Sex                     |        |                    |                 | 0.507           |
| Male                    | 187    | 92 (87.6%)         | 95 (90.5%)      |                 |
| Female                  | 23     | 13 (12.4%)         | 10 (9.5%)       |                 |
| HBsAg                   |        |                    |                 | 0.831           |
| Negative                | 25     | 13 (12.4%)         | 12 (11.4%)      |                 |
| Positive                | 185    | 92 (87.6%)         | 93 (88.6%)      |                 |
| AFP, ng/ml              |        |                    |                 | <b>0.015</b>    |
| <400                    | 133    | 75 (71.4%)         | 58 (55.2%)      |                 |
| ≥400                    | 77     | 30 (28.6%)         | 47 (44.8%)      |                 |
| Total bilirubin, μmol/l |        |                    |                 | 0.482           |
| ≤17.1                   | 170    | 87 (82.9%)         | 83 (79.0%)      |                 |
| >17.1                   | 40     | 18 (17.1%)         | 22 (21.0%)      |                 |
| Albumin, g/l            |        |                    |                 | 0.580           |
| <35                     | 14     | 6 (5.7%)           | 8 (7.6%)        |                 |
| ≥35                     | 196    | 99 (94.3%)         | 97 (92.4%)      |                 |
| ALT, U/L                |        |                    |                 | 0.478           |
| ≤44                     | 129    | 62 (59.0%)         | 67 (63.8%)      |                 |
| >44                     | 81     | 43 (41.0%)         | 38 (36.2%)      |                 |
| Tumor diameter, cm      |        |                    |                 | <b>0.011</b>    |
| <5                      | 65     | 41 (39.0%)         | 24 (22.9%)      |                 |
| ≥5                      | 145    | 64 (61.0%)         | 81 (77.1%)      |                 |
| Number of tumors        |        |                    |                 | 0.675           |
| Single                  | 184    | 93 (88.6%)         | 91 (86.7%)      |                 |
| Multiple                | 26     | 12 (11.4%)         | 14 (13.3%)      |                 |
| Micro metastasis        |        |                    |                 | <b>0.004</b>    |
| Negative                | 130    | 75 (71.4%)         | 55 (52.4%)      |                 |
| Positive                | 80     | 30 (28.6%)         | 50 (47.6%)      |                 |
| PVT                     |        |                    |                 | <b>0.025</b>    |
| Negative                | 176    | 94 (89.5%)         | 82 (78.1%)      |                 |
| Positive                | 34     | 11 (10.5%)         | 23 (21.9%)      |                 |

|                        |     |            |            |              |
|------------------------|-----|------------|------------|--------------|
| Microvascular invasion |     |            |            | <b>0.025</b> |
| Negative               | 122 | 69 (65.7%) | 53 (50.5%) |              |
| Positive               | 88  | 36 (34.3%) | 52 (49.5%) |              |

Abbreviation: HBsAg: Hepatitis B surface antigen; AFP:  $\alpha$ -fetoprotein; ALT: Alanine Aminotransferase; PVTT: portal vein tumor thrombus.  $P < 0.05$  is shown in bold.

**Supplementary Table 3. Univariate and multivariable analysis for overall survival.**

| Variables                                  | Univariate analysis |                  | Multivariate analysis |                  |
|--------------------------------------------|---------------------|------------------|-----------------------|------------------|
|                                            | HR (95%CI)          | P-value          | HR (95%CI)            | P-value          |
| Age, $\geq 50$ years                       | 1.009 (0.667–1.527) | 0.965            |                       |                  |
| Sex, male                                  | 1.472 (0.712–3.043) | 0.297            |                       |                  |
| HBsAg, positive                            | 1.175 (0.590–2.340) | 0.647            |                       |                  |
| AFP, $\geq 400$ ng/ml                      | 2.588 (1.699–3.941) | <b>&lt;0.001</b> | 2.151 (1.353–3.419)   | <b>0.001</b>     |
| Total bilirubin, $>17.1$ $\mu\text{mol/l}$ | 1.403 (0.852–2.308) | 0.183            |                       |                  |
| Albumin, $\geq 35$ g/l                     | 0.525 (0.253–1.090) | 0.084            |                       |                  |
| ALT, $>44$ U/L                             | 1.092 (0.714–1.668) | 0.685            |                       |                  |
| Tumor diameter, $\geq 5$ cm                | 3.087 (1.790–5.321) | <b>&lt;0.001</b> | 2.017 (1.106–3.577)   | <b>0.022</b>     |
| Number of tumors, multiple                 | 3.300 (1.954–5.575) | <b>&lt;0.001</b> | 3.073 (1.742–5.423)   | <b>&lt;0.001</b> |
| Micro metastasis, positive                 | 2.620 (1.722–3.987) | <b>&lt;0.001</b> | 1.279 (0.780–2.098)   | 0.329            |
| PVTT, positive                             | 2.708 (1.636–4.483) | <b>&lt;0.001</b> | 1.579 (0.907–2.749)   | 0.106            |
| Microvascular invasion, positive           | 3.517 (2.289–5.403) | <b>&lt;0.001</b> | 2.116 (1.286–3.481)   | <b>0.003</b>     |
| NET1, high expression                      | 2.319 (1.495–3.596) | <b>&lt;0.001</b> | 1.926 (1.200–3.092)   | <b>0.007</b>     |

Abbreviation: HBsAg: Hepatitis B surface antigen; AFP:  $\alpha$ -fetoprotein; ALT: Alanine Aminotransferase; PVTT: portal vein tumor thrombus.  $P < 0.05$  is shown in bold.

**Supplementary Table 4. Univariate and multivariable analysis for disease-free survival.**

| Variables                                  | Univariate analysis |                  | Multivariate analysis |              |
|--------------------------------------------|---------------------|------------------|-----------------------|--------------|
|                                            | HR (95%CI)          | P-value          | HR (95%CI)            | P-value      |
| Age, $\geq 50$ years                       | 1.075 (0.741–1.550) | 0.704            |                       |              |
| Sex, male                                  | 1.361 (0.730–2.538) | 0.332            |                       |              |
| HBsAg, positive                            | 1.229 (0.659–2.293) | 0.516            |                       |              |
| AFP, $\geq 400$ ng/ml                      | 1.981 (1.356–2.894) | <b>&lt;0.001</b> | 1.498 (0.988–2.248)   | 0.051        |
| Total bilirubin, $>17.1$ $\mu\text{mol/l}$ | 1.143 (0.722–1.810) | 0.568            |                       |              |
| Albumin, $\geq 35$ g/l                     | 0.724 (0.352–1.492) | 0.382            |                       |              |
| ALT, $>44$ U/L                             | 1.458 (0.998–2.130) | 0.051            |                       |              |
| Tumor diameter, $\geq 5$ cm                | 1.754 (1.145–2.686) | <b>0.010</b>     | 1.226 (0.757–1.987)   | 0.408        |
| Number of tumors, multiple                 | 1.500 (0.838–2.686) | 0.172            |                       |              |
| Micro metastasis, positive                 | 2.414 (1.656–3.517) | <b>&lt;0.001</b> | 1.765 (1.141–2.731)   | <b>0.011</b> |
| PVTT, positive                             | 2.497 (1.581–3.943) | <b>&lt;0.001</b> | 1.536 (0.935–2.522)   | 0.090        |
| Microvascular invasion, positive           | 2.032 (1.390–2.969) | <b>&lt;0.001</b> | 1.335 (0.851–2.094)   | 0.209        |
| NET1, high expression                      | 2.222 (1.499–3.294) | <b>&lt;0.001</b> | 1.896 (1.246–2.883)   | <b>0.003</b> |

Abbreviation: HBsAg: Hepatitis B surface antigen; AFP:  $\alpha$ -fetoprotein; ALT: Alanine Aminotransferase; PVTT: portal vein tumor thrombus.  $P < 0.05$  is shown in bold.
